# Supplementary material for: Ru–protein–Co biohybrids designed for solar hydrogen production: understanding electron transfer pathways related to photocatalytic function
Source: PubMed Central journal article supplement — Chem Sci. 2016 Aug 16;7(12):7068–78. doi: 10.1039/c6sc03121h (PMC5355951; doi:10.1039/c6sc03121h), 2016-08-16
Supplement: SC-007-C6SC03121H-s001.pdf [file SC-007-C6SC03121H-s001.pdf]

## Electronic Supplementary Information (ESI)

### **Ru-protein-Co biohybrids designed for solar hydrogen production: understanding electron transfer pathways related to photocatalytic function**

Sarah R. Soltau,<sup>a</sup> Peter D. Dahlberg,<sup>ab</sup> Jens Niklas,<sup>a</sup> Oleg G. Poluektov,<sup>a</sup> Karen L. Mulfort,<sup>a</sup> and  
Lisa M. Utschig\*<sup>a</sup>

<sup>a</sup>Chemical Sciences and Engineering Division, Argonne National Laboratory, Argonne, Illinois  
60439, United States

<sup>b</sup>Graduate Program in the Biophysical Sciences, The University of Chicago, Chicago, Illinois  
60637, United States

Email: [utschig@anl.gov](mailto:utschig@anl.gov)

#### Contents:

|            |        |
|------------|--------|
| Figures    | ESI 2  |
| References | ESI 12 |

**Figures:**

**Fig. S1** Representative photocatalytic hydrogen production time course profiles for the Ru-Fd-CoPy and Ru-ApoFId-CoBF<sub>2</sub> biohybrid complexes during visible light illumination. The assay conditions for Ru-Fd-CoPy are 2  $\mu$ M Ru-Fd-CoPy biohybrid (1.7 Co/Fd, 0.6 Ru/Fd) in 10 mM MES buffer, pH 6.3, 100 mM sodium ascorbate. The assay conditions for Ru-ApoFId-CoBF<sub>2</sub> are 1.7  $\mu$ M Ru-ApoFId-Co biohybrid (1.0 Co/Fd, 0.9 Ru/Fd) in 10 mM MES buffer, pH 6.3, 100 mM sodium ascorbate.

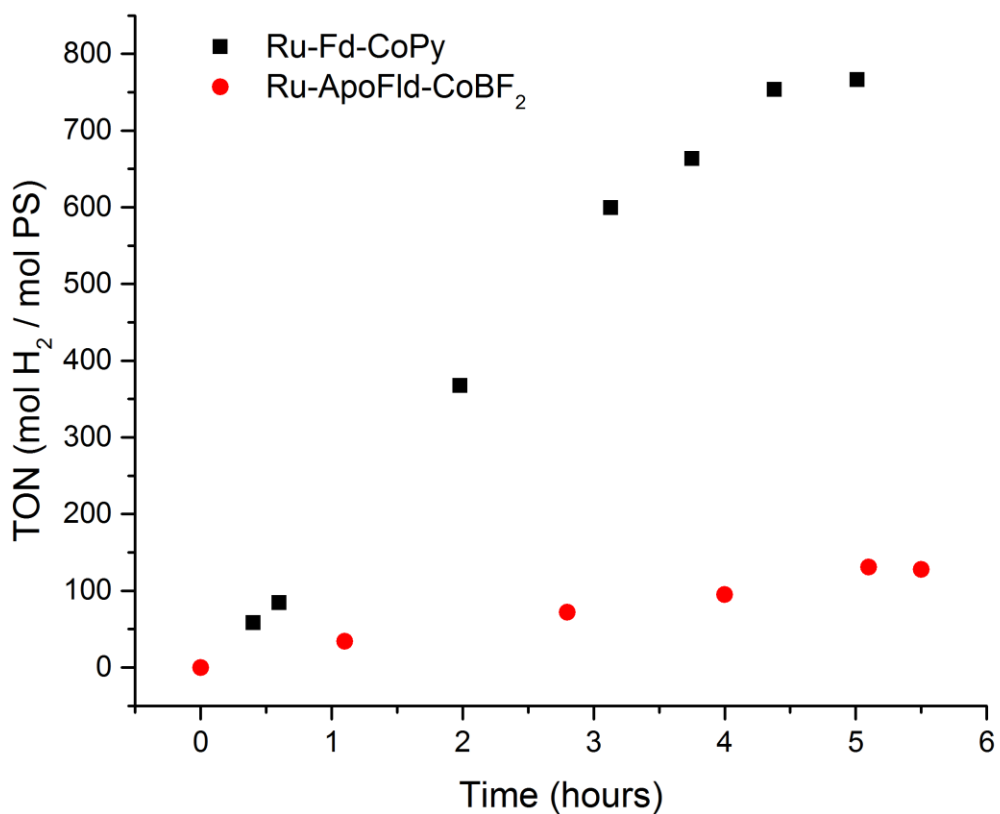

**Fig. S2** CW X-band EPR spectra of Fd and Ru-Fd-CoPy biohybrid. All EPR spectra were collected at 10 K. Samples were illuminated for 2 s at 200 K or 293 K, followed by immersion in liquid N<sub>2</sub> while illuminated and placed in a pre-cooled (10 K) EPR cavity for measurement. An asterisk marks organic species omitted for clarity ( $g \sim 2.0$ ). Ru-Fd-CoPy + asc, dark (red, 1); Ru-Fd-CoPy + asc, light at 200 K (green, 2); Ru-Fd-CoPy + asc, light at 293 K (blue, 3); Fd + dithionite (black, 4). Typical Co(II) EPR spectra for cobaloximes<sup>1</sup> are observed in all Ru-Fd-CoPy + asc samples. Ru-Fd-CoPy + asc illuminated at 200 K (green, 2) displays a Ru(III) intermediate ( $g = 2.9$ , marked with an arrow) while Ru-Fd-CoPy + asc illuminated at 293 K (blue, 3) exhibits the same  $g$ -values (2.05, 1.96, 1.89) and similar linewidth as the reduced [2Fe-2S] cluster in the native Fd protein (black,4), suggesting reduction of the [2Fe-2S] cluster in Ru-Fd-CoPy during photocatalysis.

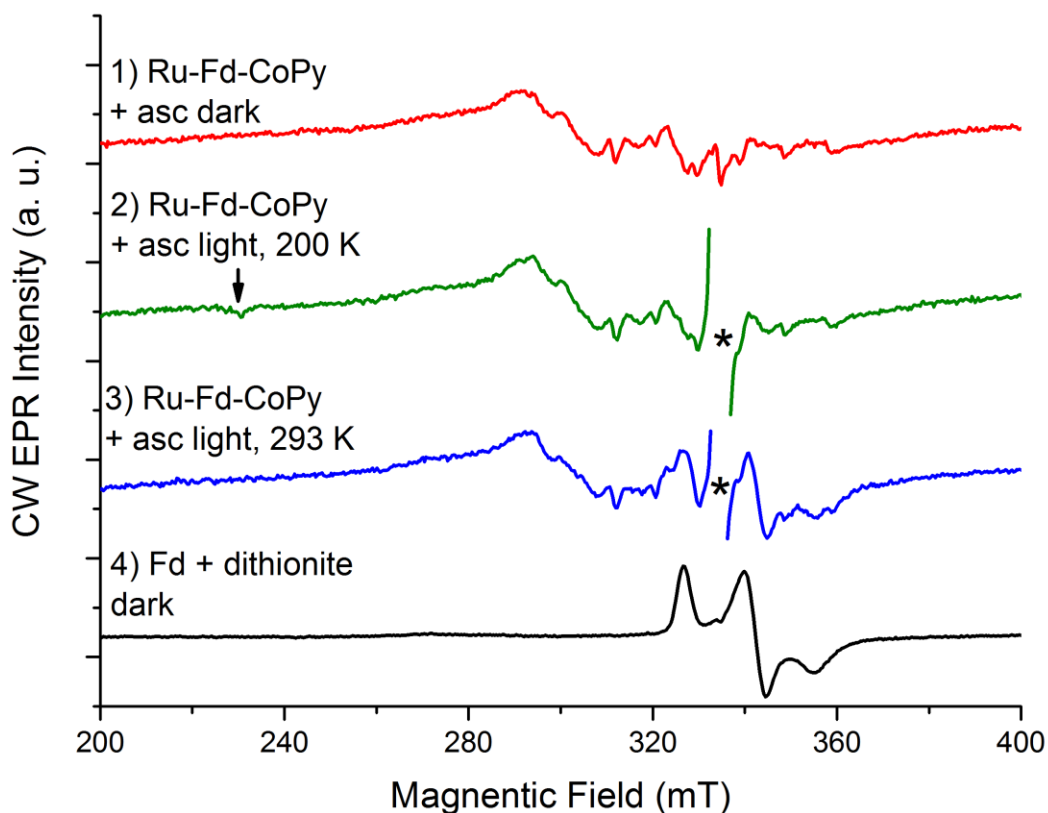

**Fig. S3** CW X-band EPR spectra of Ru-ApoFld-CoBF<sub>2</sub> biohybrid. Data were collected at 10 K, with illumination for 2 s at 293 K, followed by immersion in liquid N<sub>2</sub> during illumination and placed in a pre-cooled EPR resonator for measurement. Ru-ApoFld-CoBF<sub>2</sub> (black, 1); Ru-ApoFld-CoBF<sub>2</sub>, light (red, 2); Ru-ApoFld-CoBF<sub>2</sub> + asc, dark (blue, 3); Ru-ApoFld-CoBF<sub>2</sub> + asc, light at 293 K (green, 4).

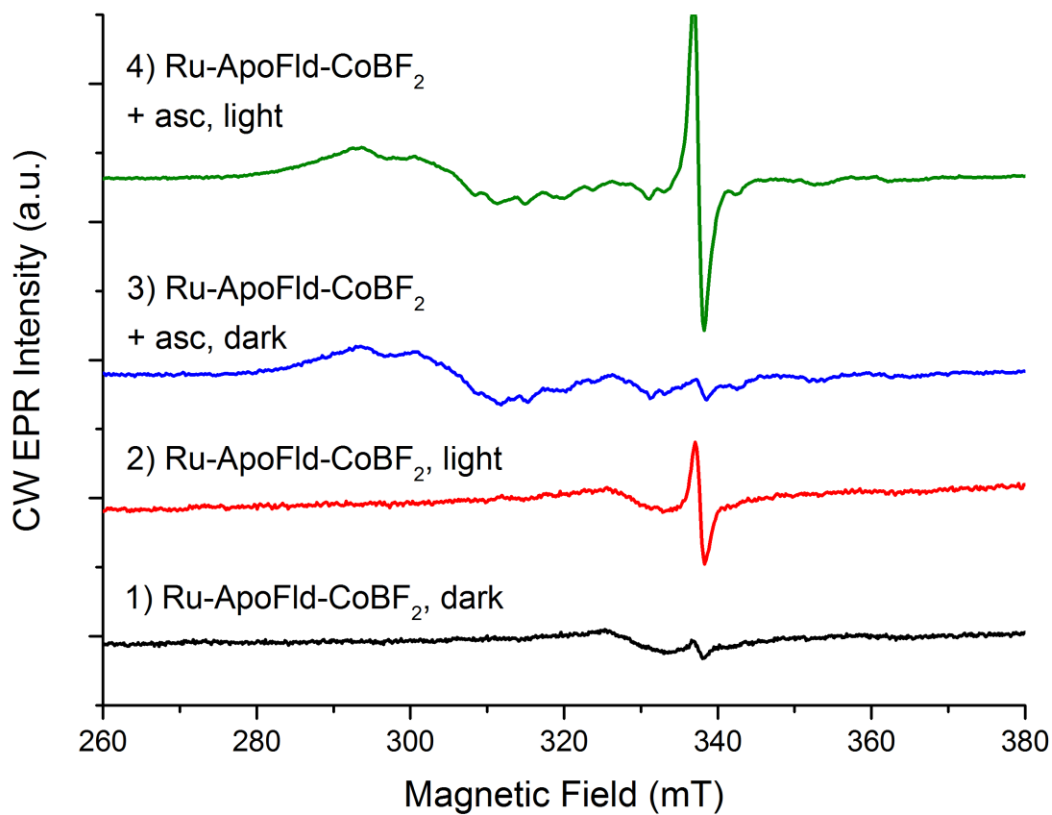

**Fig. S4** Correlation plots of (A)  $g_y$  vs.  $g_x$  and (B)  $|A_z|(^{59}\text{Co})$  vs.  $g_x$  for the  $\text{CoBF}_2$  catalyst in various solvents and protein environments. Ru-Fd- $\text{CoBF}_2$  and Ru-ApoFId- $\text{CoBF}_2$  parameters are new to this work. Other parameters are provided in previous work.<sup>1,2</sup>

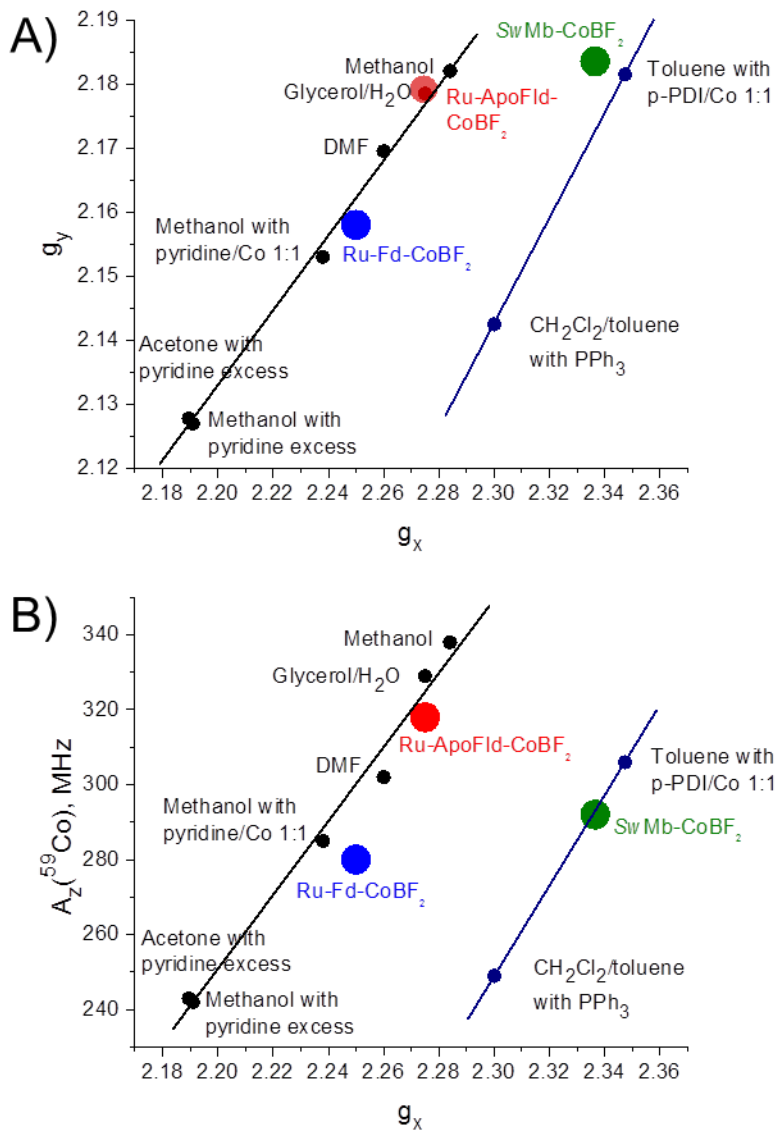

**Fig. S5** UV-visible absorbance spectra of 50  $\mu\text{M}$  Ru(II) PS ( $\text{Ru}^{2+}$ ) in 20 mM HEPES pH 7.9, 1 mM Ru(III)(bpy)<sub>3</sub> in water ( $\text{Ru}^{3+}$ ), 50  $\mu\text{M}$  CoBF<sub>2</sub> catalyst ( $\text{Co}^{2+}$ ) in 20 mM HEPES pH 7.9, 50  $\mu\text{M}$  Fd ( $[\text{2Fe-2S}]^{3+/3+}$ ) in 20 mM HEPES pH 7.9, and 50  $\mu\text{M}$  Fd ( $[\text{2Fe-2S}]^{2+/3+}$ ) in 20 mM CAPS pH 10.0 with 10 mM sodium dithionite. Multiple overlapping features in the 300-450 nm range make it difficult to resolve individual kinetic effects within this region. Reduction of the [2Fe-2S] cluster with sodium dithionite decreases the absorbance of the protein in the 400-500 nm region, however, it contributes signal in the 500-650 nm region.

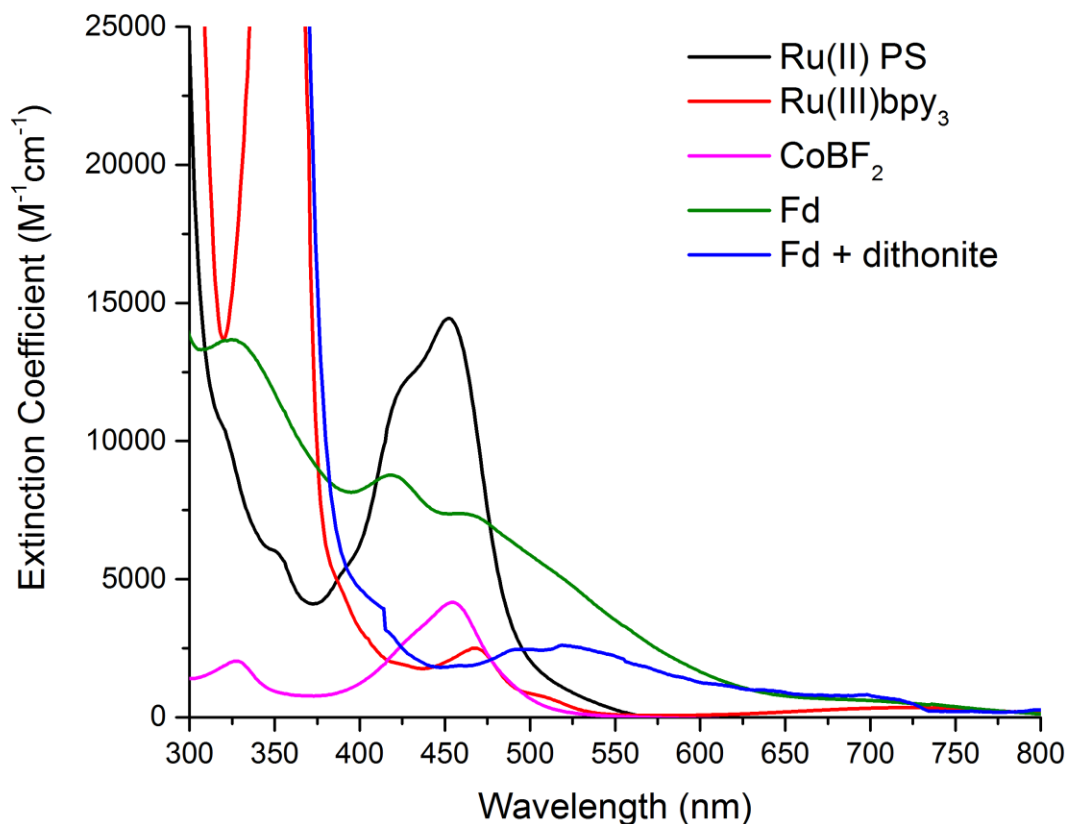

**Fig. S6** Transient optical absorption spectra at selected times for the Ru-Fd biohybrid with 200 mM sodium ascorbate (left panel) and without ascorbate (right panel). Samples were excited at 460 nm and detected with a fiber laser. In the absence of ascorbate, oxidatively quenched Ru(III) is formed within 5 ns, and electron transfer from Ru(III) to the [2Fe-2S] with reduction of the cluster from [2Fe-2S]<sup>3+/3+</sup> to [2Fe-2S]<sup>2+/3+</sup> occurs in  $\tau_1 = 300 \pm 40$  ns. Recovery of the Ru(II) ground state occurs in  $\tau_2 = 13 \pm 2$  ms (Kinetic traces, **Fig. S7**). In the presence of sodium ascorbate, reductive quenching occurs more rapidly ( $\tau_1 = 140 \pm 10$  ns). The reductively quenched Ru(I) species centered at 520 nm decays in  $\tau_2 = 4.8 \pm 0.3$   $\mu$ s. Subsequently, there is formation of a bleach feature from 475-575 nm consistent with the reduction of the [2Fe-2S] cluster in  $\tau_3 = 700 \pm 300$   $\mu$ s. Full recovery of the ground state Ru(II) species occurs in  $\tau_4 = 7.8 + 1.1$  ms (Kinetic Traces, **Fig. S8**).

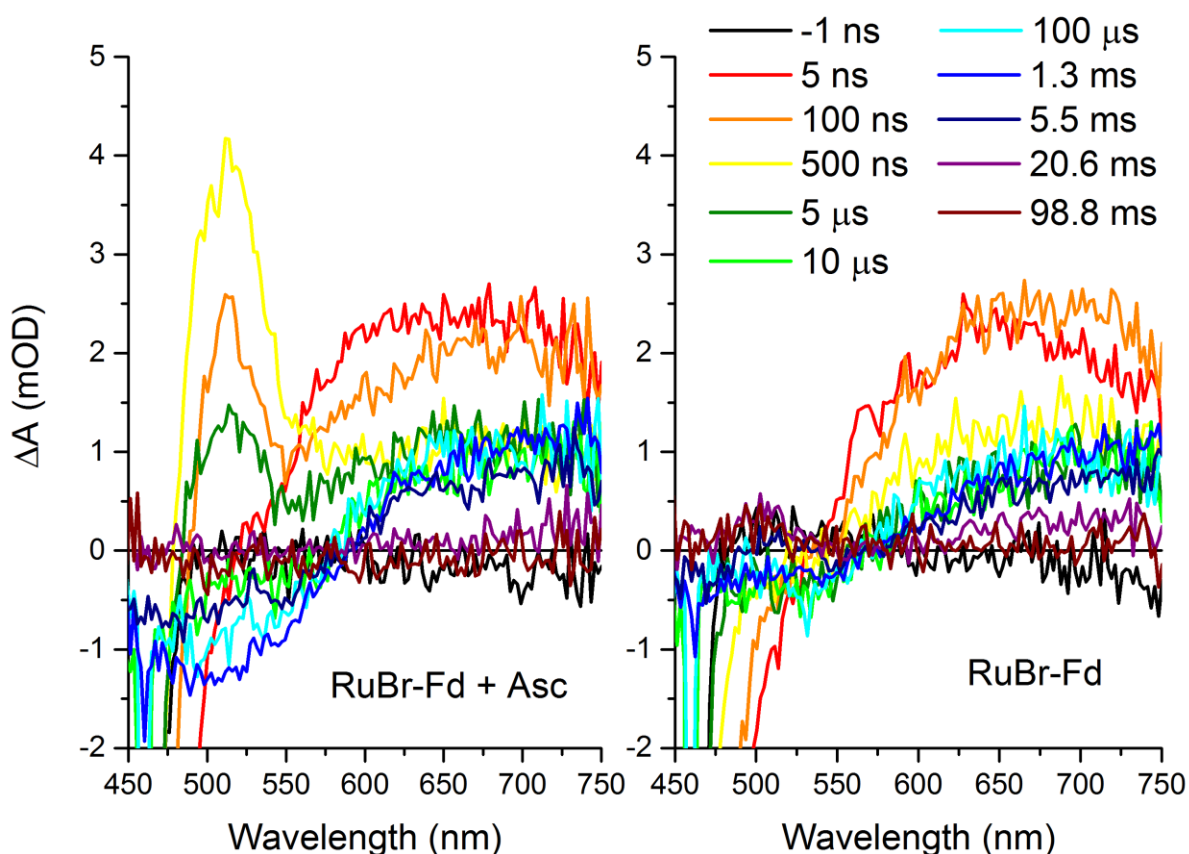

**Fig. S7** Kinetic fits of transient optical kinetic data for the Ru-Fd biohybrid using a global fitting routine at three wavelengths (520 nm (black), 620 nm (red), 736 nm (blue)) in Origin Pro 9.1. The data set was fit with a bi-exponential decay function from 10 ns – 100 ms.

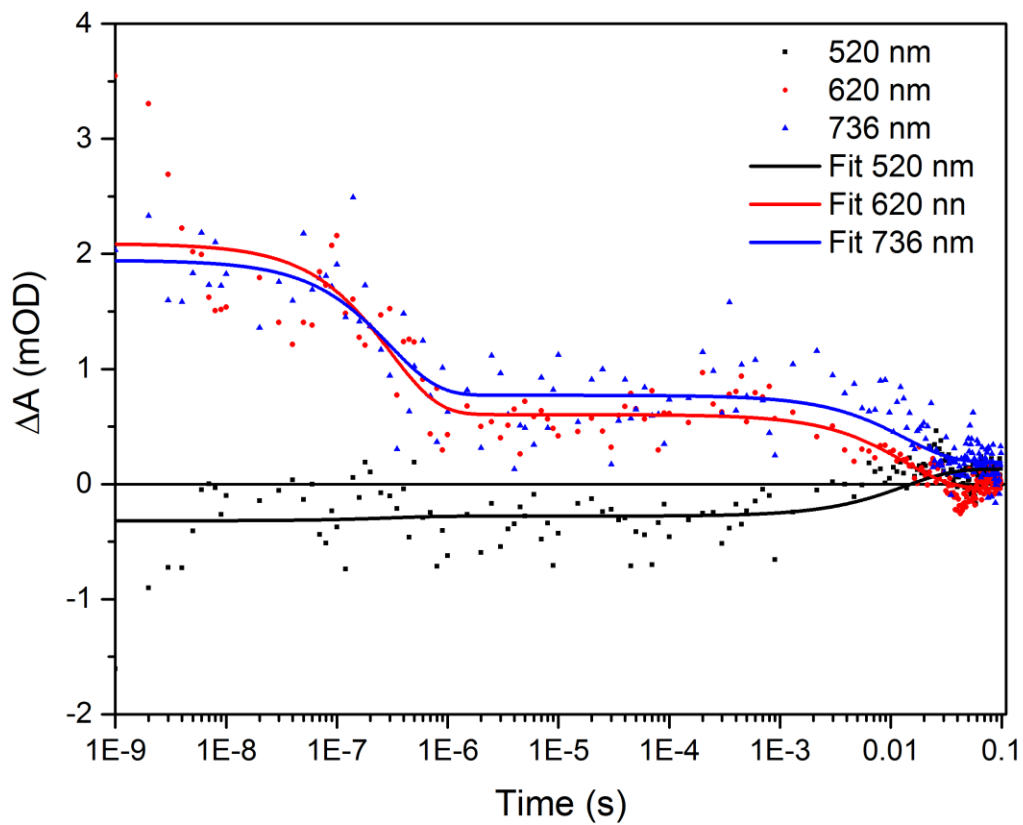



**Fig. S8** Kinetic fits of transient optical kinetic data for the Ru-Fd biohybrid with 200 mM sodium ascorbate using a global kinetic fitting routine at three wavelengths (520 nm (black), 620 nm (red), 736 nm (blue)) in Origin Pro 9.1. The data set was fit with a four-exponential decay function from 10 ns – 100 ms.

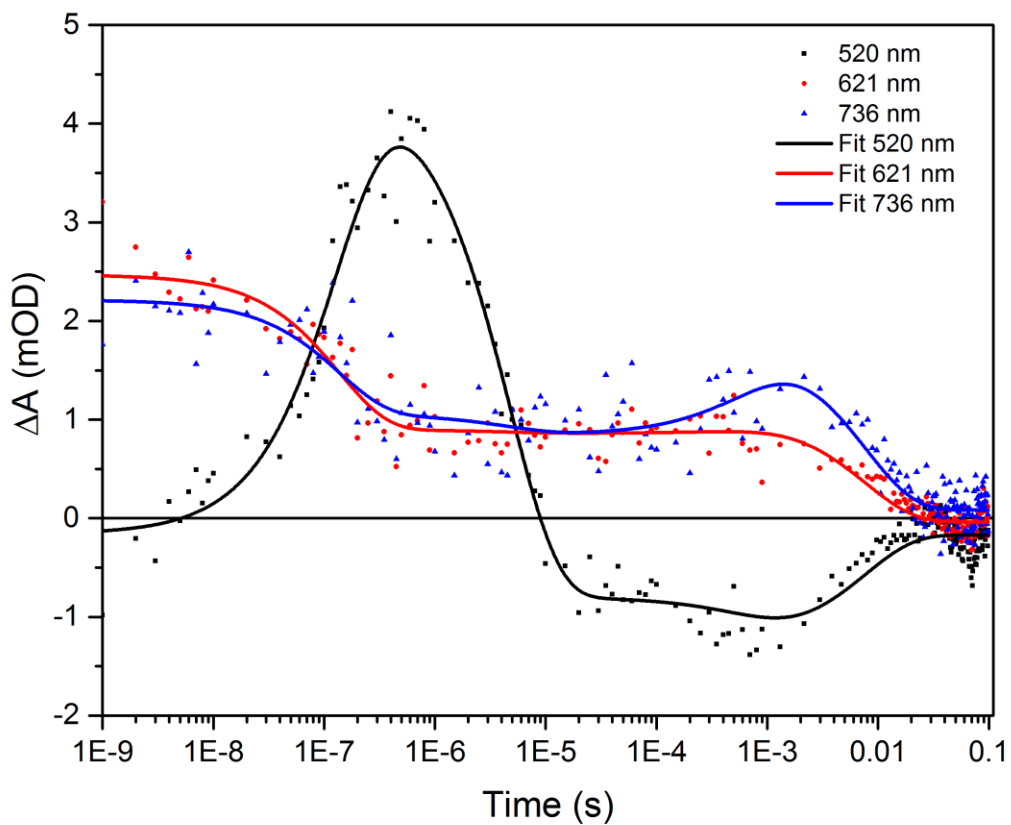

**Fig. S9** Spectroelectrochemistry of 0.4 mM  $\text{CoBF}_2$  catalyst in 10 mM phosphate buffer, pH 7.0 with 100 mM sodium chloride as an electrolyte. The Co(I) species has a maximal absorbance at 600-610 nm. Spectroelectrochemistry experiments were performed as previously reported.<sup>3</sup>

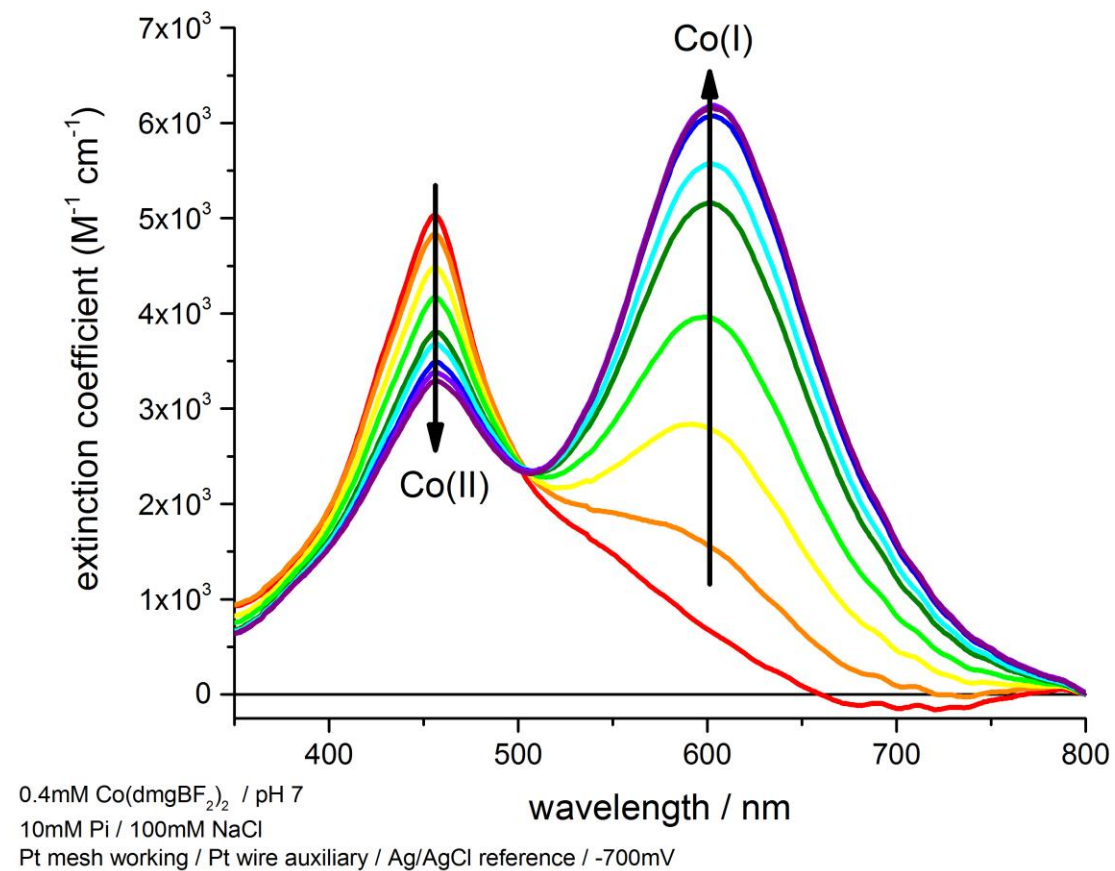

**Fig. S10** Instrument response function for homebuilt transient absorption instrument as described in the Experimental section. Measurements were taken using 460 nm excitation of [Cu(mesphen)(dimethylphen)]·PF<sub>6</sub> in acetonitrile.<sup>4</sup>

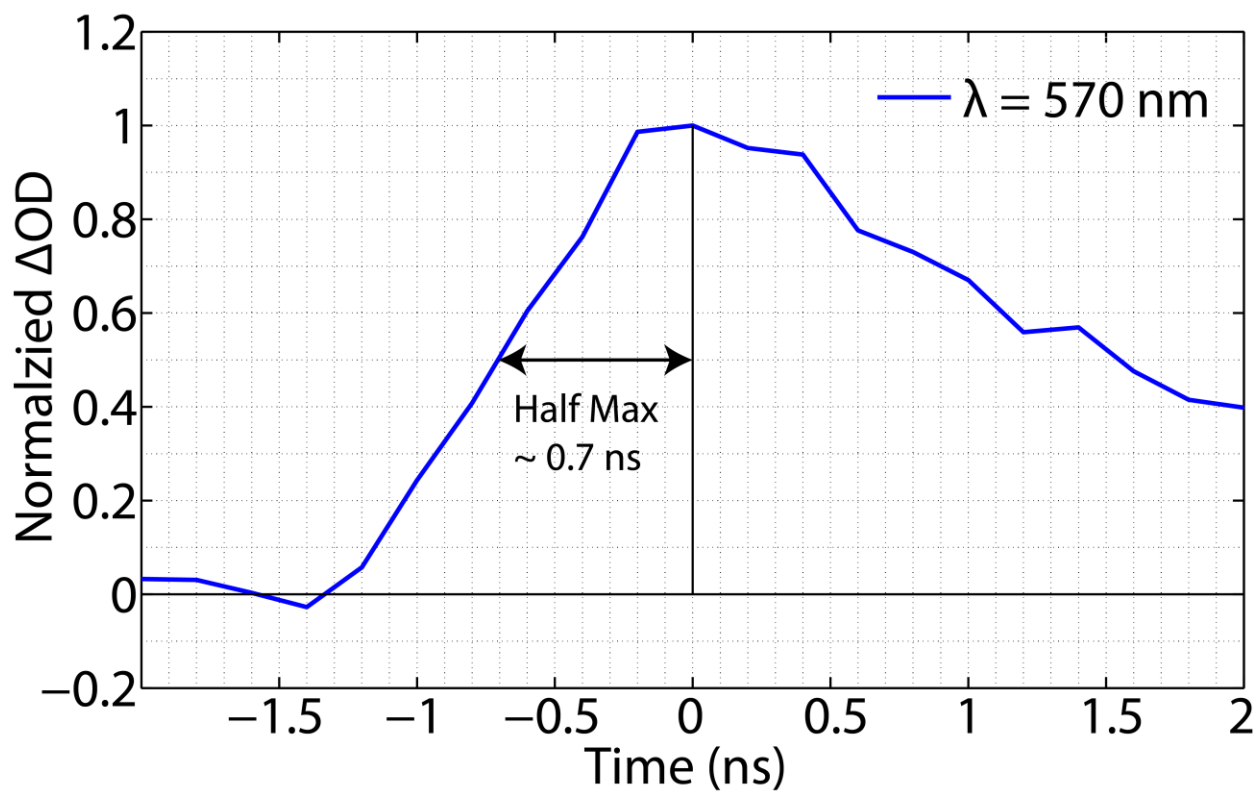

## References:

1. J. Niklas, K. L. Mardis, R. R. Rakhimov, K. L. Mulfort, D. M. Tiede and O. G. Poluektov, *J. Phys. Chem. B*, 2012, **116**, 2943-2957.
2. M. Bacchi, G. Berggren, J. Niklas, E. Veinberg, M. W. Mara, M. L. Shelby, O. G. Poluektov, L. X. Chen, D. M. Tiede, C. Cavazza, M. J. Field, M. Fontecave and V. Artero, *Inorg. Chem.*, 2014, **53**, 8071-8082.
3. S. R. Soltau, J. Niklas, P. D. Dahlberg, O. G. Poluektov, D. M. Tiede, K. L. Mulfort and L. M. Utschig, *Chem. Commun.*, 2015, **51**, 10628-10631.
4. L. Kohler, D. Hayes, J. Hong, T. J. Carter, M. L. Shelby, K. A. Fransted, L. X. Chen and K. L. Mulfort, *Dalton Trans.*, 2016, **45**, 9871-9883.
